# Supplementary material
Source: Springer Nature journal article supplement (https://www.springermedizin.de/resource/supplementary/13550_2013_183_MOESM3_ESM.pdf/9687782)

**At baseline before heparin injection**

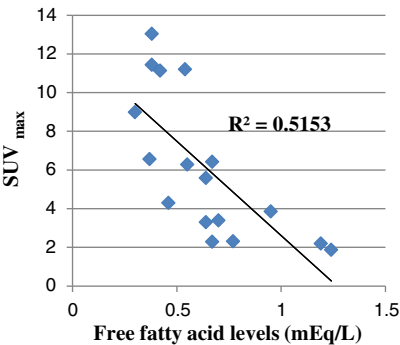

**15 min after heparin injection**

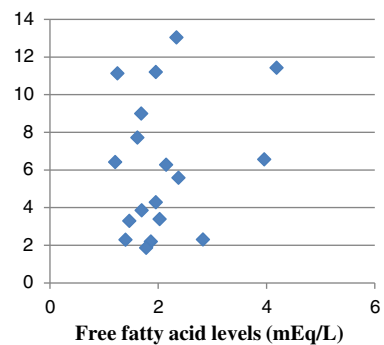

**75 min after heparin injection**

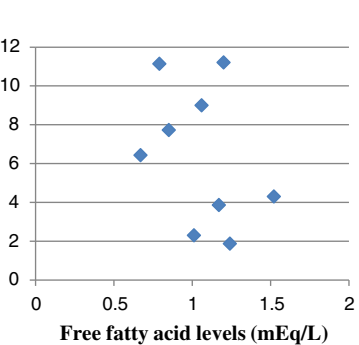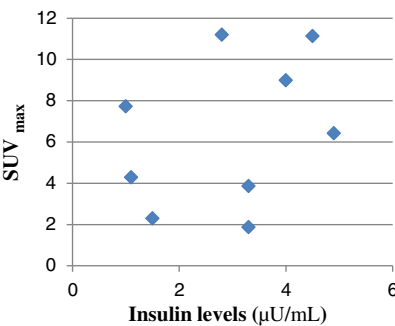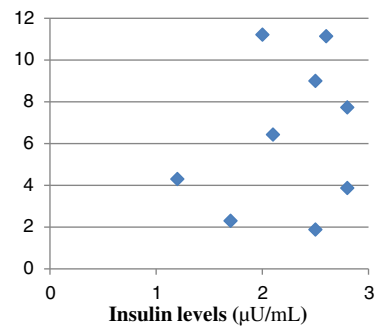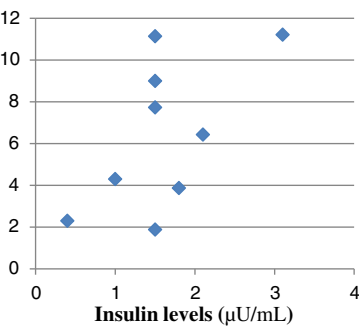

Supplement: MOESM3 [file 9687782]
